# Supplementary material for: Effect of targeted nutrient supplementation on physical activity and health-related quality of life in COPD: study protocol for the randomised controlled NUTRECOVER trial
Source: HighWire-hosted journal article supplement (doi:10.1136/bmjopen-2021-059252), 2022-03-01
Supplement: bmjopen-2021-059252supp001_data_supplement.pdf [file bmjopen-2021-059252supp001_data_supplement.pdf]

## Bijlage 4: Toestemmingsverklaring

Voor deelname aan het wetenschappelijk onderzoek:

*Het effect van een voedingsinterventie op de dagelijkse lichamelijke activiteiten en de gezondheidstoestand van patiënten met COPD (NUTRECOVER trial) (NL66543.068.18; versie 8 / 13/09/2021)*

Ik heb de informatiebrief gelezen (Versie 6). Ook kon ik vragen stellen. Ik had genoeg tijd om te beslissen of ik meedoe. Ik weet dat meedoen vrijwillig is. Ook weet ik dat ik op ieder moment kan beslissen om toch niet mee te doen of te stoppen met het onderzoek. Daarvoor hoef ik geen reden te geven.

- Ik geef toestemming voor het informeren van mijn huisarts en behandelend arts dat ik meedoe aan dit onderzoek.
- Ik geef toestemming voor het opvragen van informatie bij mijn huisarts/specialist(en) die mij behandelt voor COPD.
- Ik geef toestemming voor het verzamelen en gebruiken van mijn gegevens, bloedmonsters en lichaamsmateriaal voor de beantwoording van de onderzoeksvraag in dit onderzoek.
- Ik weet dat voor controle van het onderzoek sommige mensen toegang tot al mijn gegevens kunnen krijgen. Die mensen staan vermeld in de informatiebrief. Ik geef toestemming voor die inzage voor deze personen.
- Ik geef toestemming voor het informeren van mijn huisarts en/of behandelend specialist van onverwachte bevindingen die van belang (kunnen) zijn voor mijn gezondheid.
- Ik geef **wel/geen** (doorhalen wat **niet** van toepassing is) toestemming om mijn persoonsgegevens langer te bewaren en te gebruiken voor toekomstig onderzoek op het gebied van leefstijlveranderingen in COPD.
- Ik geef **wel/geen** (doorhalen wat **niet** van toepassing is) toestemming om mijn lichaamsmateriaal na afloop van dit onderzoek te bewaren. En om dit later nog voor ander onderzoek te gebruiken, zoals in de informatiebrief staat.
- Ik geef **wel/geen** (doorhalen wat **niet** van toepassing is) toestemming om mij na dit onderzoek te benaderen voor een vervolgonderzoek.
- Ik wil **wel/niet** (doorhalen wat **niet** van toepassing is) geïnformeerd worden over welke behandeling ik heb gehad/in welke groep ik zat.
- Ik wil meedoen aan dit onderzoek.

Naam proefpersoon: .....

Handtekening: ..... Datum: \_\_/\_\_/\_\_\_\_\_

---

*In te vullen door de onderzoeker:* Ik verklaar hierbij dat ik deze proefpersoon volledig heb geïnformeerd over het genoemde onderzoek. Als er tijdens het onderzoek informatie bekend wordt die de toestemming van de proefpersoon zou kunnen beïnvloeden, dan breng ik hem/haar daarvan tijdig op de hoogte.

Naam onderzoeker: .....

Handtekening: ..... Datum: \_\_/\_\_/\_\_\_\_\_
